# Diversity and community structure of epibenthic invertebrates and fish in the North Sea

R. Callaway, J. Alsvåg, I. de Boois, J. Cotter, A. Ford,  
H. Hinz, S. Jennings, I. Kröncke, J. Lancaster, G. Piet,  
P. Prince, and S. Ehrich

Callaway, R., Alsvåg, J., de Boois, I., Cotter, J., Ford, A., Hinz, H., Jennings, S., Kröncke, I., Lancaster, J., Piet, G., Prince, P., and Ehrich, S. 2002. Diversity and community structure of epibenthic invertebrates and fish in the North Sea. – ICES Journal of Marine Science, 59: 1199–1214.

The structure of North Sea benthic invertebrate and fish communities is an important indicator of anthropogenic and environmental impacts. Although North Sea fish stocks are monitored regularly, benthic fauna are not. Here, we report the results of a survey carried out in 2000, in which five nations sampled the epibenthic and fish fauna at 270 stations throughout the North Sea. The aim of the survey was to investigate the diversity and community structure of epibenthic and fish communities and to identify relationships with environmental factors, including the frequency of commercial otter and beam trawling disturbance. Epibenthic species diversity was lower in the southern North Sea than in central and northern areas. Fish, conversely, were more diverse in the south. The 50 m, 100 m and 200 m depth contours broadly defined the boundaries of benthic and fish communities. The abundance of epibenthos of the southern North Sea was dominated by free-living species, whilst north of the 50 m contour sessile species prevailed. A hybrid area, with sessile species typical of the north and free-living species characteristic of the south, was found off the Norfolk and Flamborough coast stretching towards the Dogger Bank.

Large-scale hydrodynamic phenomena were most likely to be responsible for the main divisions between communities, especially the boundary between mixed and stratified water masses. However, bottom temperature, sediment parameters and beam trawling were closely correlated with species richness and diversity, as well as community patterns, and may modify regional species composition.

Our study shows that effective large-scale sampling of benthic communities can be conducted during existing fisheries surveys. Since annual fisheries surveys are conducted throughout the northeast Atlantic shelf seas, concurrent benthic surveys would allow benthic sampling on unprecedented spatial and temporal scales. The samples would help to monitor the environmental impacts of trawling disturbance, climate change, pollution and other natural and anthropogenic factors.

© 2002 International Council for the Exploration of the Sea. Published by Elsevier Science Ltd. All rights reserved.

Keywords: epibenthos, fish, diversity, community structure, fishing effects, North Sea.

Received 11 February 2002; accepted 8 April 2002.

R. Callaway (née R. Zühlke), J. Lancaster, and A. Ford: School of Biological Sciences, University of Wales Swansea, Singleton Park, Swansea, SA4 3SW, UK. H. Hinz and I. Kröncke: Forschungsinstitut Senckenberg, Schleusenstrasse 39a, D-26382 Wilhelmshaven, Germany. J. Alsvåg: Institute for Marine Research, Bergen, Norway. I. De Boois and G. Piet: Netherlands Institute for Fisheries Research (RIVO), PO Box 58, 1970 AB IJmuiden, The Netherlands. P. Prince: Danish Institute for Fisheries Research, Hirtshals, Denmark. J. Cotter and S. Jennings: Centre for Environment, Fisheries and Aquaculture Science, Lowestoft Laboratory, NR33 0HT, UK. S. Ehrich: Bundesforschungsanstalt für Fischerei, Institut für Seefischerei, Palmaille 9, D-22767 Hamburg, Germany. Correspondence to R. Callaway: e-mail: [bdzuhlke@swansea.ac.uk](mailto:bdzuhlke@swansea.ac.uk)

## Introduction

Several studies have described the diversity and community structure of epibenthic invertebrates and demersal

fish in the North Sea (Petersen, 1914; Dyer *et al.*, 1983; Basford *et al.*, 1989; Frauenheim *et al.*, 1989; Kröncke, 1990; Duineveld *et al.*, 1991; Rogers *et al.*, 1998; Rees *et al.*, 1999). However, all the studies of epibenthos used

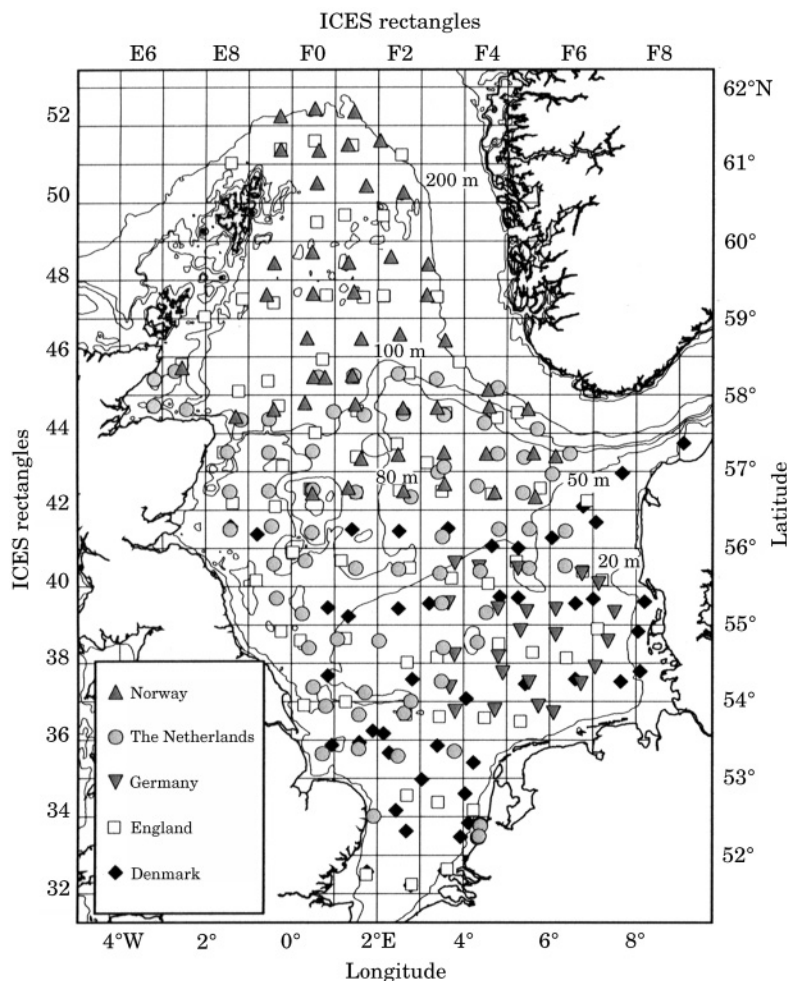

Figure 1. Sampling stations.

different sampling methods and the analyses were often based on a limited number of stations. From 1996 to 1998 a European project standardized the sampling design for epibenthic surveys and implemented invertebrate biodiversity monitoring on national groundfish surveys (GFS), which monitor fish stocks for scientific and management purposes (Jennings *et al.*, 1999; Anon., 2001; Callaway *et al.*, 2002). This greatly extended the geographical coverage with limited financial resources. The first international survey was carried out in 1999 (Zühlke *et al.*, 2001). Here we report the results of the 2000 survey. A 2 m steel beam trawl (Jennings *et al.*, 1999) was deployed during five European 3rd quarter groundfish surveys to sample epibenthos. Diversity of demersal fish communities was assessed from the catches of the 2-m beam trawl as well as the main survey trawl – a Grande Ouverture Verticale (GOV) otter trawl (Anon., 1996). The aims of the present study are to provide a large scale description of epibenthos and fish

diversity throughout the North Sea, to identify spatial patterns in fish and benthic community structure and to relate environmental factors, including the frequency of trawling disturbance, to diversity and community structure.

## Methods

Epibenthic invertebrates and demersal fish were sampled at 270 stations in the North Sea, covering 139 ICES rectangles (Figure 1). Samples were taken during national 3rd quarter 2000 groundfish surveys (GFS) of five European countries: Germany, The Netherlands, England, Norway and Denmark.

### Sampling gear and procedure

Samples were taken with a 2-m beam trawl constructed from galvanized steel. It was fitted with a 20 mm

stretched mesh (10 mm knot to knot) and a cod-end liner of 4 mm knotless mesh (2 mm “knot” to “knot”). A chain-mat was attached to minimize the catch of heavy rocks. Details about the equipment and sampling protocol are given in [Jennings \*et al.\* \(1999\)](#) and [Zühlke \*et al.\* \(2001\)](#).

### Sample treatment

Samples were washed through a 5 mm sieve (internal mesh size) and epibenthic fauna and fish were separated from other material. Species that could not be identified at sea were preserved in 4% formalin solution buffered with  $3 \text{ g l}^{-1}$  sodium acetate trihydrate for later identification in the laboratory. All animals were identified to the lowest possible taxonomic level. Species names were standardized to the nomenclature of [Picton and Howson \(1999\)](#). Free-living fauna and fish were counted and weighed with a seagoing marine scale (Pols) with an accuracy of 1 g. Sessile animals were recorded as present or absent.

### ICES fish data

In addition to the data collected from the 2-m beam trawl samples, species-abundance data for fish caught with the GOV survey otter trawl on the national GFSS ([Knijn \*et al.\*, 1993](#)) were analysed. The data were extracted from the ICES (International Council for the Exploration of the Sea) International Bottom Trawl Survey Database (Copenhagen, DK).

### Environmental data

Sediment samples were taken at 60 stations during the English survey. The dried sediment samples were sieved through a series of standard sieves from 2000  $\mu\text{m}$  to 63  $\mu\text{m}$  mesh to determine the grain size distribution. Bottom and surface temperature and salinity data were recorded on the survey vessel and provided from a database maintained by CEFAS (Lowestoft, UK).

The latest and most complete international commercial trawling effort data were available for 1998. Six countries contributed to a compilation: The Netherlands, Germany, England, Scotland, Norway and Denmark. Beam trawling and otter trawling effort were separated. All data were recorded as hours fishing by ICES statistical rectangle (boxes  $0.5^\circ$  latitude  $\times$   $1^\circ$  longitude), since we did not have sufficiently disaggregated data to account for differences in vessel type, power, towing speed, fishing gear design and other factors that would influence the area impacted by trawls per unit time.

### Data analysis

Mean diversity indices and biomass were calculated for each ICES rectangle. Hill's diversity indices  $N_0$  and  $N_1$

were calculated, where  $N_0$  is the total number of species (species richness) and  $N_1$  is an index of the number of abundant species [ $\exp(H)$ , where  $H$  is Shannon–Wiener diversity] ([Hill, 1973](#)).

Abundance and biomass were standardized to a tow length of 200 m (area = 400  $\text{m}^2$ ). Numbers of species were analysed as numbers of species per haul.

Multivariate community analysis was carried out with the statistical package PRIMER 5 ([Clarke and Warwick 1994](#)). Hierarchical cluster analysis was used to separate groups of stations with similar species assemblages. The data matrix for all epibenthic species was presence/absence transformed, because sessile species were recorded as present or absent only. Abundance of fish was double square root transformed. The Bray–Curtis index was calculated between each possible pair of samples. Species which were predominantly responsible for the similarity within clusters and for the separation between clusters, were determined with the PRIMER program SIMPER. This examines the percentage contribution that each species makes to the similarity within the cluster and to the difference between two clusters.

The term “community” is used for groups of stations with similar epibenthic or fish species derived from cluster analysis. Ecological interactions are not implied.

The relationships between environmental factors and univariate diversity indices were analysed by calculating product moment correlation coefficients. Multivariate statistical tools were then used to analyse the epibenthic community structure in relation to environmental factors. The PRIMER program BIO-ENV ([Clarke and Warwick, 1994](#)) calculated which set of environmental factors and fishing effort was best correlated with the epibenthic community structure. For each possible combination of environmental factors a dissimilarity matrix based on normalized Euclidean distances was calculated. The agreement between the biotic matrix and matrices of environmental factors was expressed as the Spearman rank correlation coefficient.

To visualize the relationship between environmental factors and the epibenthic community structure, values of abiotic factors were superimposed onto MDS plots (multi dimensional scaling). MDS plots were based on Bray–Curtis indices of presence/absence transformed epibenthic data.

## Results

A total of 456 epibenthic and 64 fish species was recorded at the 270 stations sampled during the surveys.

### Diversity pattern of epibenthic species

Numbers of invertebrate species were lower in the southern than in the northern North Sea ([Figure 2a](#)).

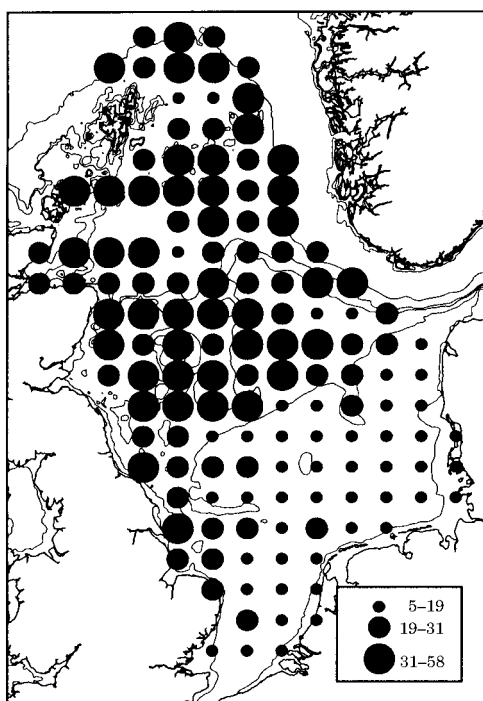

(a) Epibenthic species

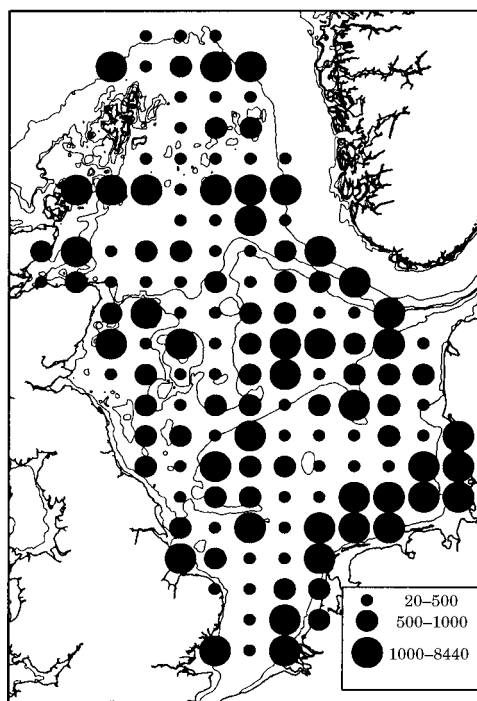

(b) Biomass epibenthic species

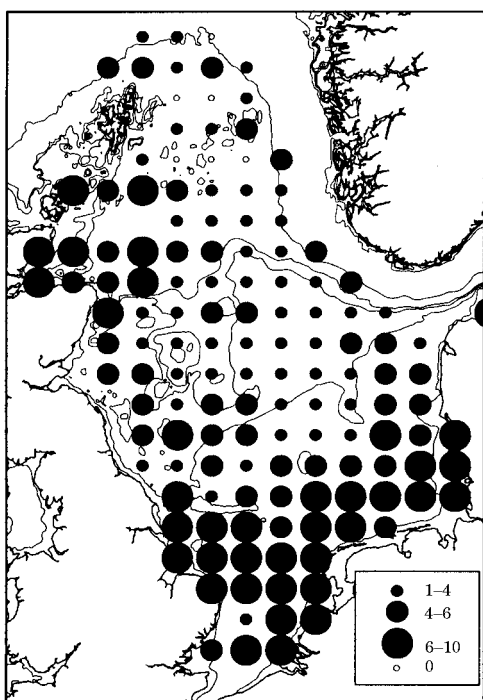

(c) Demersal fish (2 m beam trawl)

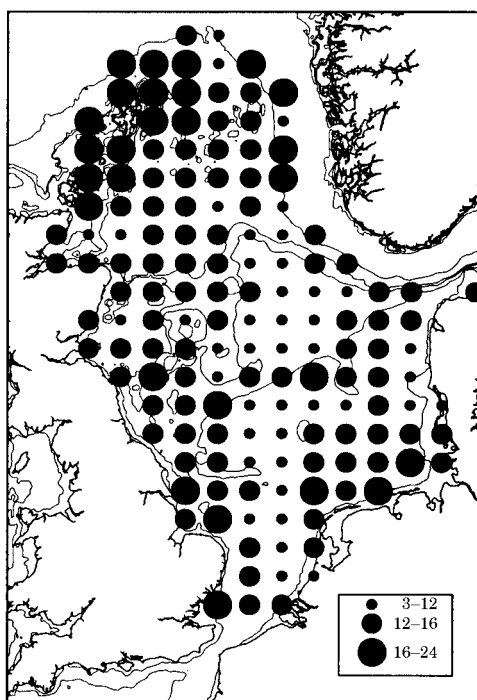

(d) Fish (otter trawl)

Figure 2. Total number of epibenthic species and fish (ICES rectangle<sup>-1</sup>) in the North Sea in 2000. (a) Total number of epibenthic species. (b) Mean epibenthic biomass. Numbers are based on wet-weight of free living species. (c) Total number of demersal fish caught with a 2-m beam trawl. (d) Total number of fish species (h trawling<sup>-1</sup>) caught by otter trawling. Source of data: ICES International Bottom Trawl Survey Database.



The division between areas of low and high numbers of species roughly corresponded with the 50 m contour. In the southern North Sea the mean number of species was  $14 \pm 6 \text{ haul}^{-1}$ , while in the northern North Sea it was  $30 \pm 10 \text{ haul}^{-1}$ . An area off the Humber Estuary and Norfolk coast did not fit the general pattern. Here, numbers of species were comparable to stations in the northern North Sea, although the area was less than 50 m deep.

Biomass was high along the continental coast, in central parts of the North Sea and at several stations in the northern North Sea (Figure 2b). A limited number of free-living species was responsible for this pattern. In shallow parts of the North Sea along the continental coast, the starfish *Asterias rubens* and the brittle stars *Ophiura albida* and *Ophiura ophiura* were abundant. The hermit crab *Pagurus bernhardus* and the starfish *Astropecten irregularis* were responsible for high biomass at stations in the central North Sea, while in the northern North Sea *Echinus* spp. and hermit crabs contributed to the high biomass recorded. This is partly reflected in the distribution patterns of the more abundant species (Figure 3).

### Diversity pattern of fish species

Most of the fish caught with the 2-m beam trawl were small demersal (bottom dwelling) species. The spatial pattern of species richness opposed that of the epibenthos (Figure 2c), with the highest numbers of species in the southern North Sea and low numbers in the north (with the exception of areas around the Scottish coast). The numbers of fish caught by otter trawling (source: ICES database) were high in the far north, at some stations along the continental and English coast and at a few stations in the central North Sea (Figure 2d).

### Epibenthic community structure

Cluster analysis based on presence/absence transformed data divided the fauna into two main clusters, which could be further subdivided into seven clusters (Figure 4a, Table 1). The 50 m depth contour divided the two main clusters (Figure 4b). Four sub-clusters were situated in the southern North Sea, at depths less than 50 m, and three in the central and northern North Sea. The largest community in the southern North Sea (Figure 4, ■) was characterized by *P. bernhardus* (Figure 3a), *A. rubens* (Figure 3b), *A. irregularis*, *Corystes cassivelaunus* (Figure 3c), *Liocarcinus holsatus*, *O. ophiura*, *O. albida* (Figure 3d) and *Psammechinus miliaris*. The majority of ICES rectangles along the continental coast formed a group (Figure 4, ●), which was a species-poor version of the afore mentioned community. The scarcity of *C. cassivelaunus*, *P. miliaris* and *Aphrodita aculeata*, as well as the absence of *Hydrallmania falcata*, contributed to

their separation. The cluster in the southern-most area of the North Sea towards the English Channel (Figure 4, ▲) was characterized by the regular presence of the shrimps *Crangon crangon*, *Crangon allmanni* and *Philoceras trispinosus*, while *C. cassivelaunus* and *A. irregularis* were less abundant. Although sessile species played a minor role in the southern North Sea, one region shallower than 50 m depth, stretching from Norfolk up to the Dogger Bank, was an exception (Figure 4, ◆). This cluster was separated from the others by the regular presence of bryozoans such as *Alcyonidium diaphanum* (Figure 3j), *Alcyonidium parasiticum*, *Eucratea loricata* and *Flustra foliacea* as well as hydrozoans such as *H. falcata* (Figure 3i) and *Halecium halecium*. In this respect this cluster was similar to the northern North Sea cluster, although the free-living fauna were typical southern North Sea species.

Clusters in the northern North Sea were located between the depth contours 50–100 m and 100–200 m, but their separation was less conspicuous than between clusters in the south (Figure 4). A large range of species found between the 50 m and 100 m depth (Figure 4, ○), were not recorded in the shallower southern North Sea. Species contributing predominantly to the separation of this cluster from the ones to the south were whelks such as *Neptunea antiqua* (Figure 3f) and *Colus gracilis*, the hermit crabs *Pagurus pubescens* and *Anapagurus laevis* (Figure 3g) as well as species such as *Hydroides norvegica*, *Hyas coarctatus* (Figure 3e), *F. foliacea* and *Epizoanthus papillosus* (formerly *E. incrustatus*). The cluster between the 100 m and 200 m depth line (Figure 4, ◇) was characterized by *A. irregularis*, *Hyalinoecia tubicula* (Figure 3h), *Hormathia digitata* (Figure 3k) and *Echinus* spp. Many species occurring regularly in the 50–100 m community were less frequently found between 100 m and 200 m (e.g. *A. digitatum*, *F. foliacea* and *Tubularia indivisa*), a factor contributing to the separation of the clusters.

A small cluster was formed by the ICES rectangles north of 61°N latitude (Figure 4, □). These stations were characterized by the presence of the hexacoral *Caryophyllia smithii* (Figure 3l) but otherwise by the absence of several species found further south.

### Fish community structure

Fish communities were divided into two main groups located south and north of the 50 m depth line. This was true for fish caught with the 2-m beam trawl and otter trawl. Cluster analysis based on fish species caught with the 2-m beam trawl separated one cluster for the southern North Sea and three for the north (Figure 5a & b, Table 2).

The community of the southern North Sea (Figure 5b, ■) was characterized by small, non-commercial species. Most common were *Buglossidium luteum*

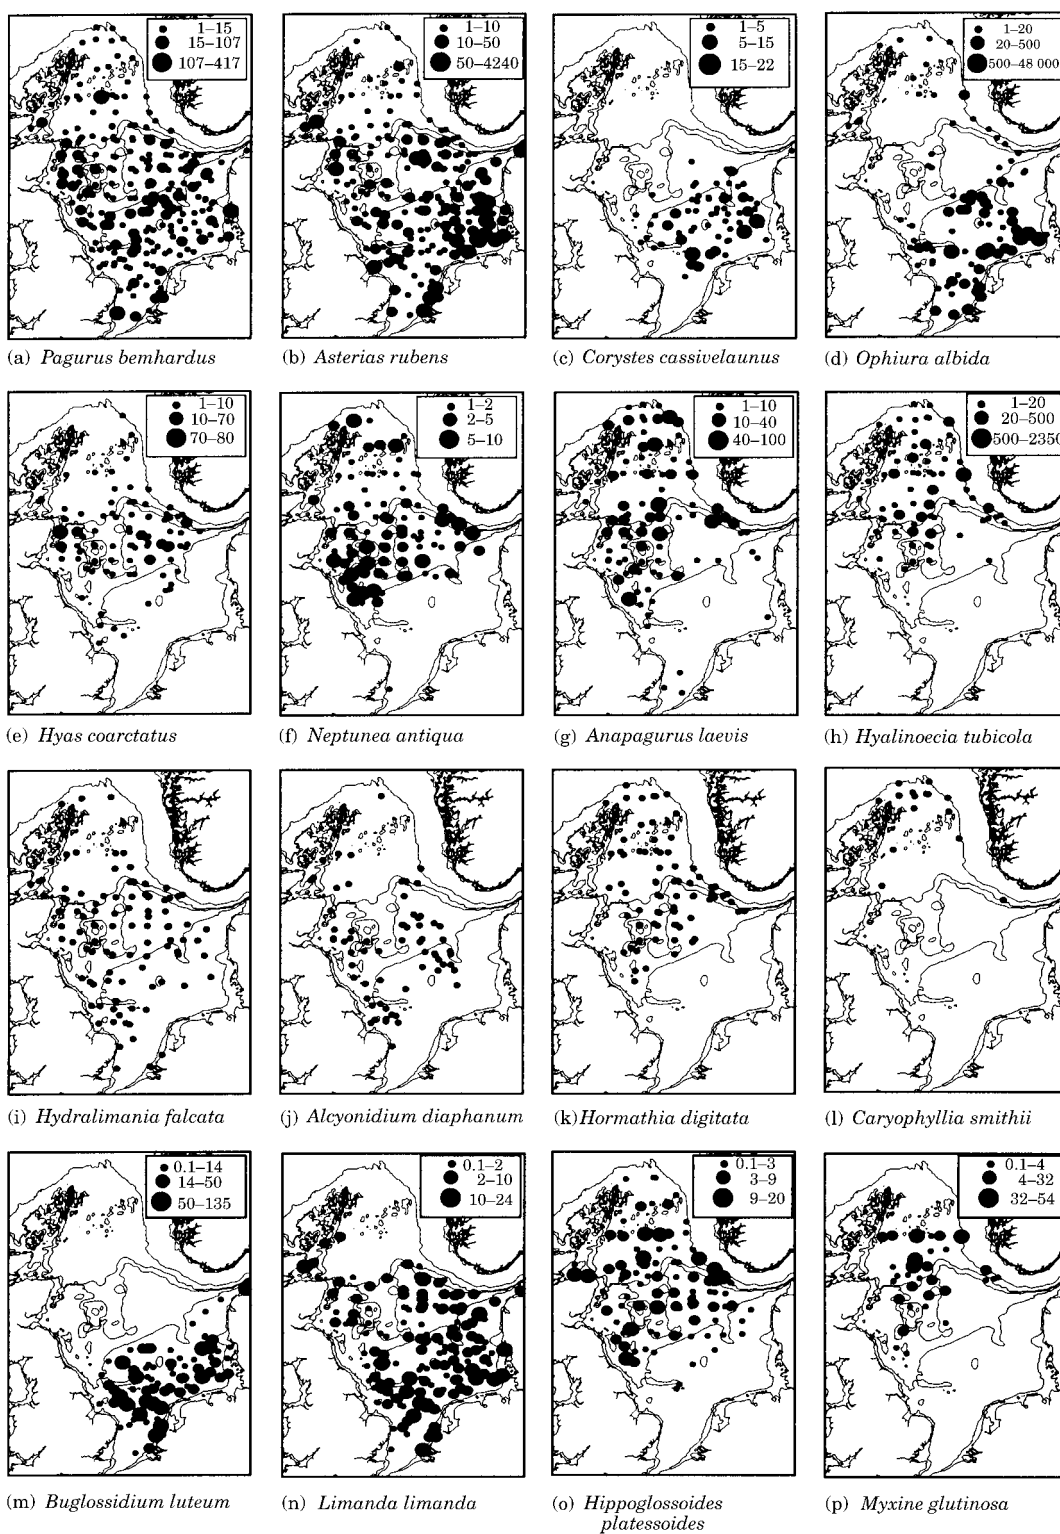

Figure 3. Distribution of species characteristic for epibenthic and fish communities. The size of bubbles indicates abundance. Species were recorded as present or absent if no legend is shown.

## Epibenthic communities

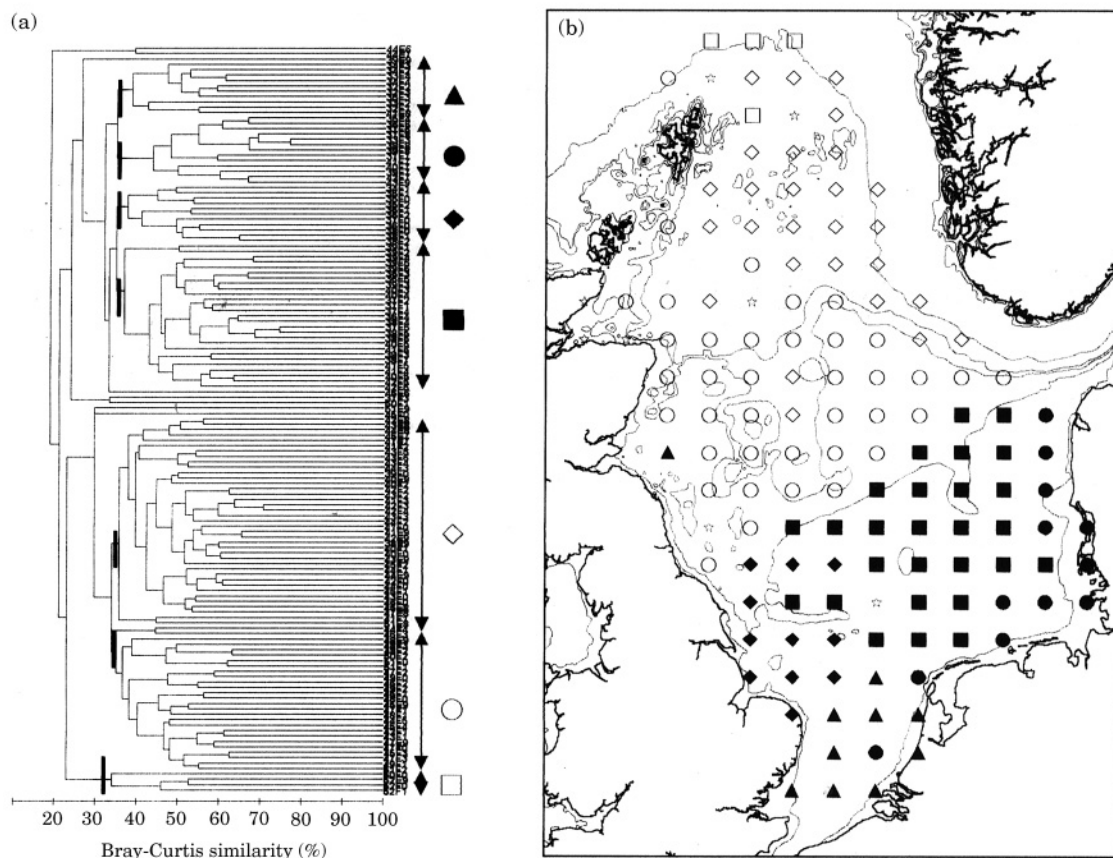

Figure 4. Epibenthic communities in the North Sea in 2000. (a) Hierarchical classification analysis based on presence/absence transformed data. Vertical bars indicate the main groupings. (b) Location of clusters identified by hierarchical classification analysis (☆ outliers).

(solenette, Figure 3m), *Limanda limanda* (dab, Figure 3n) and *Callionymus lyra* (dragonet). *Arnoglossus laterna* (scaldfish) were regularly recorded, but in low numbers.

In the central and northern North Sea one cluster ranged from 50–100 m and another from 100–200 m. Between 50 m and 100 m (Figure 5b, △) fewer of the small, non-commercial species were found. Numbers of *L. limanda* were higher than in the south and *Hippoglossoides platessoides* (long rough dab, Figure 3o) were recorded regularly. In waters deeper than 100 m (Figure 5b, ○), *H. platessoides* was the characterizing species for the community, together with *Myxine glutinosa* (hagfish, Figure 3p). Some ICES rectangles in the far north (Figure 5b, ◇), around the 200 m depth line, were grouped as a third cluster based on the paucity of demersal fish in this area.

For fish caught with the GOV trawl during the survey (source: ICES database) cluster analysis formed three clusters in the south, one in the central and one in the northern North Sea (Figure 5c & d, Table 3).

In the southern North Sea two of the three clusters were spatially dominating, but they were inter-mixed rather than geographically discrete (Figure 5d, ■●). Both clusters were characterized by a similar range of species, including *Merlangius merlangus* (whiting), *Eutrigla gurnardus* (grey gurnard), *L. limanda* and *Trachurus trachurus* (scad). Differences in abundance of these species were responsible for the separations into two clusters. A third smaller cluster was formed in the far south between the English and Dutch coast (Figure 5d, ▲). Higher numbers of *T. trachurus* and *Scomber scombrus* (mackerel) were recorded in this area.

As with the analysis based on the 2-m beam-trawl samples, there was a division between communities from 50–100 m depth (Figure 5d, ○) and 100–200 m depth (Figure 5d, □). The area between the 50 m and 100 m contour was numerically dominated by *Melanogrammus aeglefinus* (haddock), *M. merlangus*, *Clupea harengus* (herring) and *Pleuronectes platessa* (plaice). Between

Table 1. Epibenthic species which account for most of the similarity within the clusters identified by cluster analysis. The symbols for clusters follow Figure 4. “Mean similarity” is the mean similarity within the cluster and “contribution” is the contribution of individual species to the total similarity within the group. Species contributing altogether 60% of the similarity or the six species contributing most to the similarity are shown.

| Cluster ▲<br>Mean similarity: 44.84 | Cumulative<br>contribution<br>to similarity<br>(%) | Cluster ●<br>Mean similarity: 49.90 | Cumulative<br>contribution<br>to similarity<br>(%) |
|-------------------------------------|----------------------------------------------------|-------------------------------------|----------------------------------------------------|
| <i>Pagurus bernhardus</i>           | 10.30                                              | <i>Pagurus bernhardus</i>           | 23.08                                              |
| <i>Liocarcinus holsatus</i>         | 20.59                                              | <i>Liocarcinus holsatus</i>         | 46.16                                              |
| <i>Crangon allmanni</i>             | 30.89                                              | <i>Asterias rubens</i>              | 69.24                                              |
| <i>Ophiura albida</i>               | 39.63                                              | <i>Ophiura ophiura</i>              | 77.52                                              |
| <i>Asterias rubens</i>              | 47.79                                              |                                     |                                                    |
| <i>Crangon crangon</i>              | 54.39                                              |                                     |                                                    |
| Cluster ◆<br>Mean similarity: 42.10 |                                                    | Cluster ■<br>Mean similarity: 45.08 |                                                    |
| <i>Ophiura ophiura</i>              | 6.29                                               | <i>Pagurus bernhardus</i>           | 9.29                                               |
| <i>Pagurus bernhardus</i>           | 12.57                                              | <i>Asterias rubens</i>              | 18.57                                              |
| <i>Liocarcinus holsatus</i>         | 18.86                                              | <i>Astropecten irregularis</i>      | 27.86                                              |
| <i>Alcyonidium diaphanum</i>        | 25.14                                              | <i>Corystes cassivelaunus</i>       | 36.69                                              |
| <i>Electra pilosa</i>               | 30.35                                              | <i>Liocarcinus holsatus</i>         | 43.63                                              |
| <i>Hydrallmania falcata</i>         | 35.50                                              | <i>Ophiura ophiura</i>              | 49.43                                              |
| Cluster ◇<br>Mean similarity: 42.12 |                                                    | Cluster ○<br>Mean similarity: 39.85 |                                                    |
| <i>Pagurus bernhardus</i>           | 4.73                                               | <i>Astropecten irregularis</i>      | 5.37                                               |
| <i>Neptunea antiqua</i>             | 9.19                                               | <i>Hyalinoecia tubicola</i>         | 10.22                                              |
| <i>Asterias rubens</i>              | 13.33                                              | <i>Hormathia digitata</i>           | 14.89                                              |
| <i>Colus gracilis</i>               | 17.28                                              | <i>Echinus</i> sp.                  | 19.44                                              |
| <i>Hyas coarctatus</i>              | 20.96                                              | <i>Anapagurus laevis</i>            | 23.93                                              |
| <i>Hydractinia echinata</i>         | 24.59                                              | <i>Pagurus pubescens</i>            | 27.84                                              |
| Cluster □<br>Mean similarity: 41.15 |                                                    |                                     |                                                    |
| <i>Epizoanthus papillosus</i>       | 10.14                                              |                                     |                                                    |
| <i>Echinus</i> sp.                  | 20.28                                              |                                     |                                                    |
| <i>Anapagurus laevis</i>            | 30.42                                              |                                     |                                                    |
| <i>Adamsia carciniopados</i>        | 40.56                                              |                                     |                                                    |
| <i>Caryophyllia smithii</i>         | 46.07                                              |                                     |                                                    |
| <i>Pandalus montagui</i>            | 51.50                                              |                                     |                                                    |

100 m and 200 m *Trisopterus esmarkii* (Norway pout) was the dominant species in the community.

### Environmental factors and fishing effort

Environmental factors were significantly correlated, both positively and negatively, with univariate diversity indices of the epibenthic fauna or fish (Table 4). Numbers of epibenthic species were negatively correlated with bottom temperature and beam trawling effort (Table 4, Figure 6), while they were positively correlated with bottom salinity.

Fewer correlations with environmental factors were found when analysing the southern North Sea (<50 m depth) and central-northern North Sea (>50 m depth) separately, possibly due to lower numbers of samples reducing the power to detect statistical differences. In the southern North Sea numbers of sessile benthic species were negatively correlated with beam trawling effort, but there were no other significant correlations for the benthos. In the northern North Sea numbers of epibenthic species were correlated with several sediment parameters and beam trawling effort (Table 1).



Fish caught with 2 m beam trawl

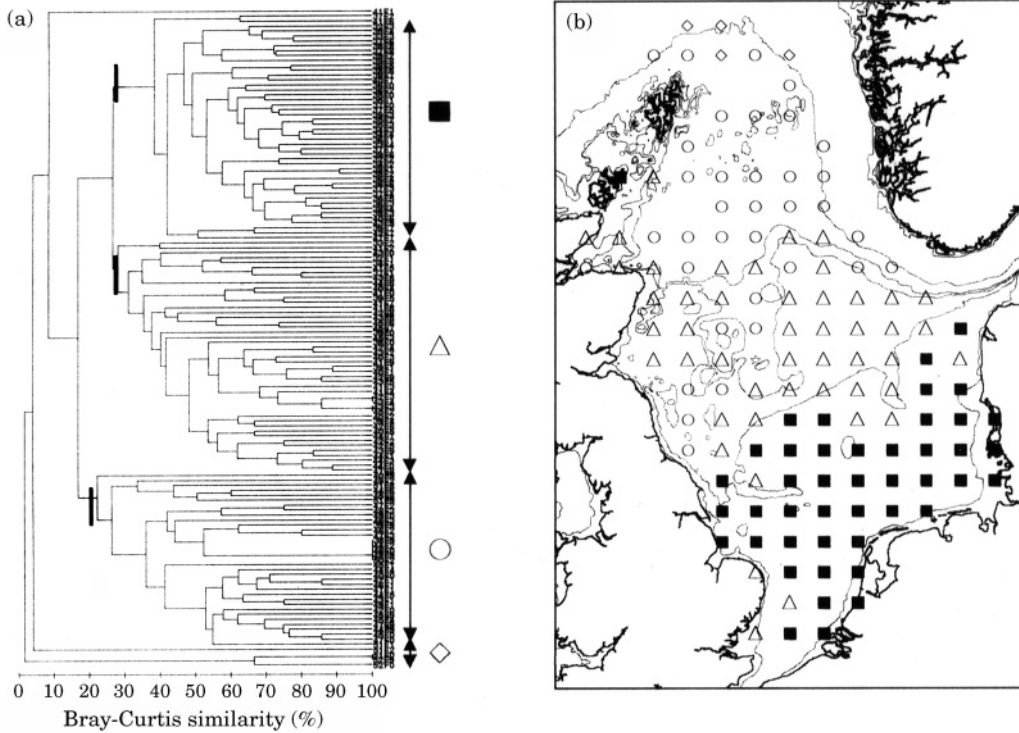

Fish caught with otter trawl

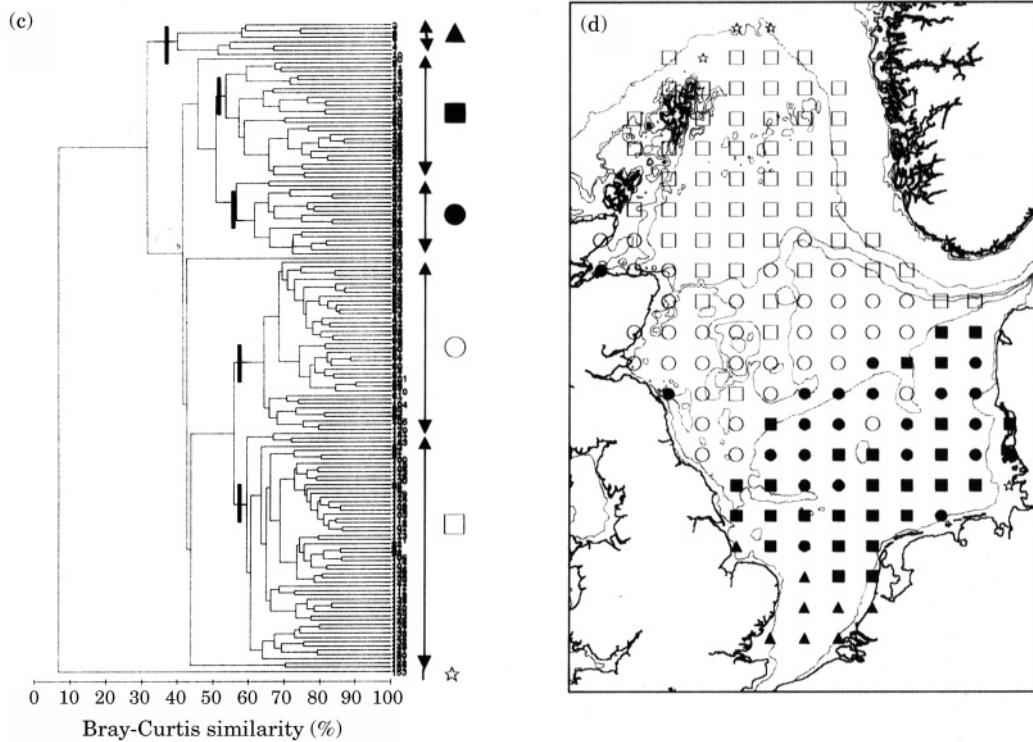

Figure 5. Fish communities in the North Sea in 2000. (a) Hierarchical classification analysis based on 4th root transformed data of fish caught with a 2-m beam trawl. Vertical bars indicate main groupings. (b) Location of fish communities indicated by dendrogram (a). (c) Hierarchical classification analysis based on 4th root transformed data of fish caught by otter trawling during groundfish surveys (source of data: ICES database). (d) Location of fish communities indicated by dendrogram (c).

Table 2. Fish species caught with the 2-m beam trawl, which accounted for most of the similarity within the clusters identified by cluster analysis. The symbols for clusters follow Figure 5. “Mean similarity” is the mean similarity within the cluster and “contribution” is the contribution of individual species to the total similarity within the group. Species contributing altogether 70% of the similarity are shown.

| Cluster ■<br>Mean similarity: 46.36 | Cumulative<br>contribution<br>to similarity<br>(%) | Cluster ○<br>Mean similarity: 36.05 | Cumulative<br>contribution<br>to similarity<br>(%) |
|-------------------------------------|----------------------------------------------------|-------------------------------------|----------------------------------------------------|
| <i>Buglossidium luteum</i>          | 27.47                                              | <i>Hippoglossoides platessoides</i> | 58.54                                              |
| <i>Limanda limanda</i>              | 47.09                                              | <i>Myxine glutinosa</i>             | 71.86                                              |
| <i>Callionymus lyra</i>             | 59.48                                              |                                     |                                                    |
| <i>Pomatoschistus minutus</i>       | 70.28                                              |                                     |                                                    |
| Cluster △<br>Mean similarity: 37.88 |                                                    | Cluster ◇<br>Mean similarity: 35.93 |                                                    |
| <i>Limanda limanda</i>              | 48.16                                              | <i>Gadiculus argenteus</i>          | 100.00                                             |
| <i>Hippoglossoides platessoides</i> | 72.18                                              |                                     |                                                    |

Table 3. Fish species, caught by otter trawling (main groundfish survey), which accounted for most of the similarity within the clusters identified by cluster analysis. The symbols for clusters follow Figure 5. “Mean similarity” is the mean similarity within the cluster and “contribution” is the contribution of individual species to the total similarity within the group. Species contributing altogether 70% of the similarity are shown.

| Cluster ▲<br>Mean similarity: 47.72 | Cumulative<br>contribution<br>to similarity<br>(%) | Cluster ■<br>Mean similarity: 59.55 | Cumulative<br>contribution<br>to similarity<br>(%) |
|-------------------------------------|----------------------------------------------------|-------------------------------------|----------------------------------------------------|
| <i>Merlangius merlangus</i>         | 19.58                                              | <i>Sprattus sprattus</i>            | 19.94                                              |
| <i>Trachurus trachurus</i>          | 32.73                                              | <i>Merlangius merlangus</i>         | 37.09                                              |
| <i>Limanda limanda</i>              | 43.95                                              | <i>Limanda limanda</i>              | 48.11                                              |
| <i>Scomber scombrus</i>             | 51.68                                              | <i>Clupea harengus</i>              | 58.21                                              |
| <i>Pleuronectes platessa</i>        | 59.12                                              | <i>Trachurus trachurus</i>          | 64.15                                              |
| <i>Echiichthys vipera</i>           | 65.75                                              | <i>Eutrigla gurnardus</i>           | 69.57                                              |
| Cluster ●<br>Mean similarity: 58.31 |                                                    | Cluster ○<br>Mean similarity: 69.51 |                                                    |
| <i>Limanda limanda</i>              | 19.66                                              | <i>Melanogrammus aeglefinus</i>     | 20.39                                              |
| <i>Merlangius merlangus</i>         | 34.21                                              | <i>Merlangius merlangus</i>         | 34.66                                              |
| <i>Eutrigla gurnardus</i>           | 47.40                                              | <i>Limanda limanda</i>              | 47.44                                              |
| <i>Trachurus trachurus</i>          | 56.48                                              | <i>Pleuronectes platessa</i>        | 56.56                                              |
| <i>Scomber scombrus</i>             | 64.46                                              | <i>Clupea harengus</i>              | 65.05                                              |
| <i>Pleuronectes platessa</i>        | 72.31                                              | <i>Eutrigla gurnardus</i>           | 72.99                                              |
| Cluster □<br>Mean similarity: 65.57 |                                                    |                                     |                                                    |
| <i>Trisopterus esmarkii</i>         | 22.63                                              |                                     |                                                    |
| <i>Melanogrammus aeglefinus</i>     | 39.64                                              |                                     |                                                    |
| <i>Merlangius merlangus</i>         | 50.52                                              |                                     |                                                    |
| <i>Clupea harengus</i>              | 59.67                                              |                                     |                                                    |
| <i>Pleuronectes platessa</i>        | 67.72                                              |                                     |                                                    |
| <i>Microstomus kitt</i>             | 71.99                                              |                                     |                                                    |

(a) Beam trawling ( $\text{h year}^{-1}$ )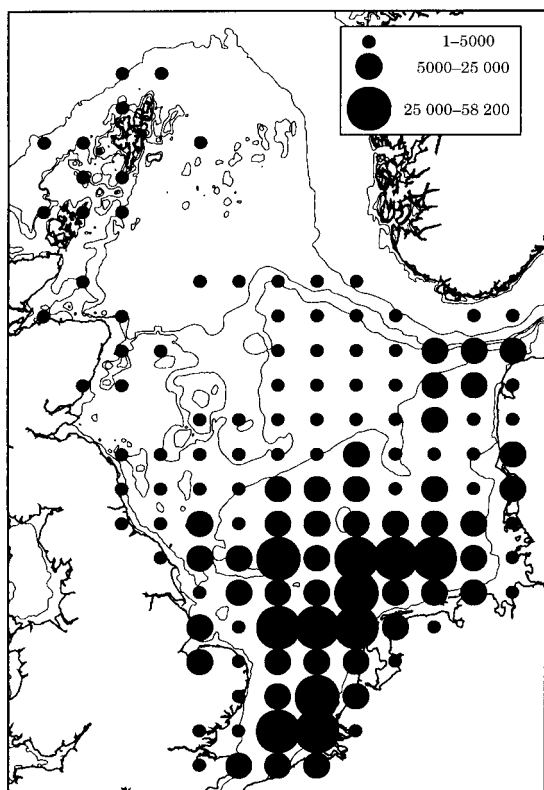(b) Otter trawling ( $\text{h year}^{-1}$ )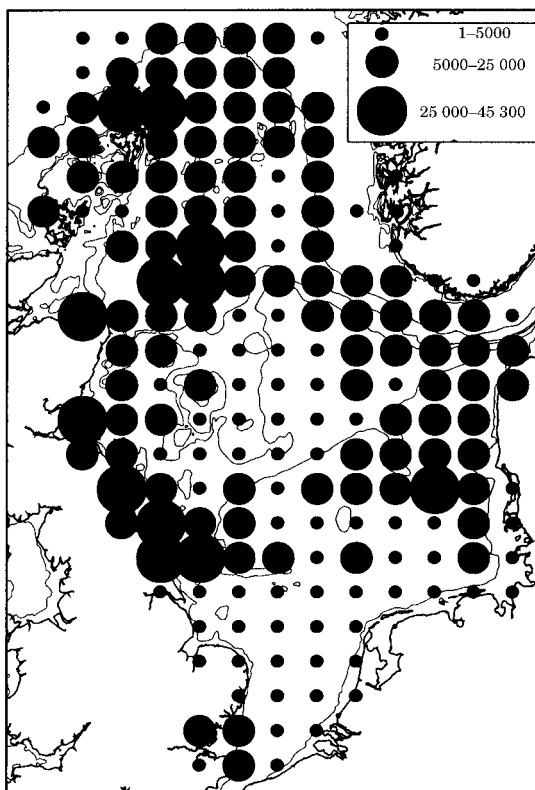

Figure 6. Beam and otter trawling effort 1998 ( $\text{h ICES rectangle}^{-1} \text{ year}^{-1}$ ). Cumulated data of Germany, The Netherlands, England, Denmark, Norway and Scotland.

The BIO-ENV procedure (Clark and Warwick, 1994) was used to find the combination of abiotic factors which best accounted for the epibenthic community structure (Table 5, Figure 7). In the entire North Sea and in the northern North Sea, bottom temperature, the mud content of the sediment and beam trawling provided the best explanation of epibenthic community structure (Figure 7, Table 5). In the southern North Sea the patterns in community structure were best explained by other sediment parameters, beam trawling effort and otter trawling effort (Table 5).

This analysis was compromised by several inter-correlations between environmental factors. Negative correlations were found for beam trawling and otter trawling, bottom temperature and the amount of mud in the sediment, the 250  $\mu\text{m}$  and 125  $\mu\text{m}$  sediment fraction for stations in less than 50 m depth and bottom temperature and bottom salinity for stations deeper than 50 m. Positive correlations occurred between bottom temperature and beam trawling and beam trawling and the amount of fine sand in the southern North Sea. Clarke and Warwick (1994) suggested substituting correlated factors by just one of them. However, we

decided to include all factors in the analysis because the inter-correlations between environmental factors were not consistent for all the spatial areas analysed.

## Discussion

The fauna of the southern North Sea was dominated by free-living invertebrates and small demersal fish, while in the north sessile species played a greater role. A hybrid area, with a sessile fauna typical for the northern North Sea and free-living species characteristic for the south, was found off the coast of Norfolk and Flamborough stretching towards the Dogger Bank.

The most conspicuous boundary for North Sea fish and epibenthic communities was the 50 m depth line which separates the southern and central-northern North Sea. The 100 m and 200 m contours can also be viewed as faunal boundaries, but they are less clearly defined than the boundary at 50 m depth. These boundaries are similar to those noted by Künitz et al. (1992) in their study of infauna communities.

Table 4. Significant positive and negative correlations (product moment correlation coefficient ( $r$ ),  $p < 0.05$ ) between univariate indices of the fauna and environmental factors (sediment fraction 1000  $\mu\text{m}$ , 500  $\mu\text{m}$ , 250  $\mu\text{m}$ , 63  $\mu\text{m}$ , <63  $\mu\text{m}$ , bottom temperature, bottom salinity, otter trawling, beam trawling). Correlation analysis was carried out for stations of the entire North Sea (A), for stations shallower than 50 m (B) and deeper than 50 m (C). If an environmental factor is not listed no significant relationship was found. Numbers of fish species were derived from 2-m beam trawl samples. The analysis was based on samples of the English survey.

| A. all sampling stations; $n=59$ , $r_{0.05(2),57}=0.256$ | Total number of epibenthic species | Number of sessile epibenthic species | Number of free-living epibenthic species | Hill's $N_1$ (based on free-living epibenthos) | Number of fish species |
|-----------------------------------------------------------|------------------------------------|--------------------------------------|------------------------------------------|------------------------------------------------|------------------------|
| Sediment <63 $\mu\text{m}$ (g)                            |                                    | - 0.31                               |                                          |                                                |                        |
| Bottom temperature ( $^{\circ}\text{C}$ )                 | - 0.67                             | - 0.50                               | - 0.67                                   | - 0.54                                         | +0.43                  |
| Bottom salinity (‰)                                       | +0.50                              | +0.37                                | +0.50                                    |                                                | - 0.26                 |
| Beam trawling ( $\text{h y}^{-1}$ )                       | - 0.55                             | - 0.50                               | - 0.45                                   | - 0.41                                         |                        |
| B. stations <50 m depth; $n=21$ , $r_{0.05(2),19}=0.433$  |                                    |                                      |                                          |                                                |                        |
| Sediment 1000 $\mu\text{m}$ (g)                           |                                    |                                      | +0.56                                    |                                                |                        |
| Bottom temperature ( $^{\circ}\text{C}$ )                 |                                    |                                      |                                          |                                                | +0.44                  |
| Beam trawling ( $\text{h y}^{-1}$ )                       |                                    | - 0.44                               |                                          |                                                |                        |
| C. stations >50 m depth; $n=38$ , $r_{0.05(2),36}=0.320$  |                                    |                                      |                                          |                                                |                        |
| Sediment <63 $\mu\text{m}$ (g)                            | - 0.47                             | - 0.64                               |                                          |                                                |                        |
| Sediment 63 $\mu\text{m}$ (g)                             |                                    | - 0.60                               |                                          |                                                |                        |
| Sediment 125 $\mu\text{m}$ (g)                            |                                    | +0.43                                |                                          |                                                |                        |
| Sediment 250 $\mu\text{m}$ (g)                            | +0.38                              | +0.51                                |                                          |                                                |                        |
| Bottom temperature ( $^{\circ}\text{C}$ )                 |                                    |                                      |                                          |                                                | - 0.47                 |
| Beam trawling ( $\text{h y}^{-1}$ )                       | - 0.32                             |                                      |                                          | - 0.33                                         |                        |

## Epibenthos

The lower epibenthic diversity and species richness in the southern than northern North Sea was consistent with the results of previous studies (Frauenheim *et al.*, 1989; Jennings *et al.*, 1999; Zühlke *et al.*, 2001). However, previous authors did not separate the epibenthos of the south into different communities, mainly due to the constraints imposed by low levels of sample replication and the statistical tools available at that time. We differentiated four communities in the southern North Sea. Their separation was based on the rich sessile fauna off the Norfolk and Flamborough coasts, high numbers of shrimp and prawn species in the far south and the overall scarcity of species along the continental coast.

Several species were ubiquitous in all four communities, such as the brittle star *Ophiura ophiura*, the starfish *Asterias rubens*, the hermit crab *Pagurus bernhardus* and the swimming crab *Liocarcinus holsatus*. Their ubiquity was consistent with patterns described in previous years (e.g. Frauenheim *et al.*, 1989; Jennings *et al.*, 1999; Rees *et al.*, 1999).

We identified three epibenthic communities in the central-northern North Sea, and again, the locations of these communities are broadly consistent with those described in previous reports (Dyer *et al.*, 1983; Basford *et al.*, 1989; Frauenheim *et al.*, 1989; Jennings *et al.*, 1999). The 50 m, 100 m and 200 m boundaries also coincide with the concept of three infaunal étages developed by Glemarec (1973), as confirmed and differentiated by Künitzer *et al.* (1992).

The 50 m depth contour was the southern distribution border for many sessile and free-living species. However, the abundance of free-living fauna in the 50–100 m community was dominated by species which were also found in the south, namely *P. bernhardus*, *A. rubens* and *A. irregularis*. This was in accordance with the results of Dyer *et al.* (1983), who stated that many species which were common at the southern stations were caught in the north. Most conspicuous in the community found at depths of 50–100 m was the diverse sessile fauna, with numerous hydrozoans, bryozoans and tube-dwelling polychaetes. Basford *et al.* (1989) found matching distribution patterns for several of the most common sessile species (e.g. *Alcyonidium digitatum*, *Flustra foliacea*,



Table 5. Relationship between environmental factors and the community structure. The combination of environmental factors, which showed the highest correlation [Spearman rank correlation ( $\rho$ )] with the epibenthic community structure are listed. Results are based on multivariate data analysis.

|                        | Entire North Sea                                                                                                                                                  | <50 m depth (south)                                                                                                                                                                                                                                                 | >50 m depth (north)                                                                                                                                                                                                                             |
|------------------------|-------------------------------------------------------------------------------------------------------------------------------------------------------------------|---------------------------------------------------------------------------------------------------------------------------------------------------------------------------------------------------------------------------------------------------------------------|-------------------------------------------------------------------------------------------------------------------------------------------------------------------------------------------------------------------------------------------------|
| All epibenthic species | <ul style="list-style-type: none"> <li>● Bottom temperature</li> <li>● &lt;63 <math>\mu</math>m sediment fraction</li> <li>● Beam trawling</li> </ul> $\rho=0.67$ | <ul style="list-style-type: none"> <li>● 250 <math>\mu</math>m sediment fraction</li> <li>● 125 <math>\mu</math>m sediment fraction</li> <li>● Beam trawling</li> <li>● Otter trawling</li> </ul> $\rho=0.50$                                                       | <ul style="list-style-type: none"> <li>● Bottom temperature</li> <li>● Bottom salinity</li> <li>● 125 <math>\mu</math>m sediment fraction</li> <li>● &lt;63 <math>\mu</math>m sediment fraction</li> <li>● Beam trawling</li> </ul> $\rho=0.58$ |
| Free-living species    | <ul style="list-style-type: none"> <li>● Bottom temperature</li> <li>● &lt;63 <math>\mu</math>m sediment fraction</li> <li>● Beam trawling</li> </ul> $\rho=0.61$ | <ul style="list-style-type: none"> <li>● 1000 <math>\mu</math>m sediment fraction</li> <li>● 500 <math>\mu</math>m sediment fraction</li> <li>● 250 <math>\mu</math>m sediment fraction</li> <li>● Bottom salinity</li> <li>● Otter trawling</li> </ul> $\rho=0.56$ | <ul style="list-style-type: none"> <li>● 500 <math>\mu</math>m sediment fraction</li> <li>● 63 <math>\mu</math>m sediment fraction</li> <li>● Bottom temperature</li> <li>● Bottom salinity</li> <li>● Beam trawling</li> </ul> $\rho=0.52$     |
| Sessile species        | <ul style="list-style-type: none"> <li>● Bottom temperature</li> <li>● &lt;63 <math>\mu</math>m sediment fraction</li> <li>● Beam trawling</li> </ul> $\rho=0.60$ | <ul style="list-style-type: none"> <li>● 250 <math>\mu</math>m sediment fraction</li> <li>● 125 <math>\mu</math>m sediment fraction</li> <li>● Beam trawling</li> <li>● Otter trawling</li> </ul> $\rho=0.33$                                                       | <ul style="list-style-type: none"> <li>● Bottom temperature</li> <li>● Bottom salinity</li> <li>● 63 <math>\mu</math>m sediment fraction</li> <li>● &lt;63 <math>\mu</math>m sediment fraction</li> <li>● Beam trawling</li> </ul> $\rho=0.58$  |

*Bolocera tuediae*) in this area between 1980 and 1985. North of the 100 m contour, *Echinus* spp. were highly abundant at several stations, as also reported by Dyer *et al.* (1983).

Our results were also consistent with those of previous studies when viewed at a smaller spatial scale. Thus Duineveld *et al.* (1991) separated an epibenthic community situated along the continental coast from an off-shore community and other authors found a species rich sessile epifauna off the Norfolk coast (Hamond, 1969; Rees *et al.*, 1999). The presence of the sessile bryozoan *A. diaphanum* in the Dogger Bank area was mentioned by Duineveld *et al.* (1991) and Dyer *et al.* (1983) (both authors used the previous name *A. gelatinosum*).

For the area north of the 100 m contour there are some differences between our results and those of previous authors. For example, Dyer *et al.* (1983) and Basford *et al.* (1989) allocate their northern samples to rather different clusters. An examination of individual species distributions suggests that these differences between clusters do not reflect changes in the spatial distribution of epibenthic communities over time. Rather, they are likely to be the result of different sampling methods and data analysis. Standardization of epibenthic sampling techniques was attempted only recently (Jennings *et al.*, 1999; Callaway *et al.*, 2002).

## Fish

Although the two sampling methods, the 2-m beam and otter trawl, would have selected for fish of different sizes

and different species, the reported spatial distributions of fish communities are remarkably similar. As with the epibenthic communities, the spatial distribution of fish communities was closely related to the <50 m, 50–100 m and 100–200 m depth bands.

However, because the two types of trawl were catching different species in the community, patterns of species richness were different. With the 2-m beam trawl, which catches small species closely associated with the seabed, we recorded high species-richness in shallow areas of the southern North Sea and along the English and Scottish coast and low species richness in the northern North Sea. With the GOV otter trawl, which most effectively catches demersal species more loosely associated with the seabed (Sparholt, 1990), species richness was highest in the far north, in scattered areas along the English and continental coast, and in the central North Sea. This emphasizes the necessity to integrate results from different survey methods in order to gain a comprehensive picture of the fish fauna.

The fish community patterns were consistent with those described by Rogers *et al.* (1998), who collected samples with a 4-m beam trawl. Rees *et al.* (1999) included fish caught with a 2-m beam trawl into their multivariate analysis of benthic community structure and showed that small flatfish characterized the southern North Sea benthic assemblage. The small flatfish that dominate the southern North Sea bottom dwelling fish community are significant consumers of benthic infaunal production (Braber & de Groot, 1973; Connell and Anderson 1999).



powerful influence on the distribution, abundance and production of benthic fauna (e.g. Duineveld *et al.*, 1991; Brey, 1999). Annual variation in bottom water temperature is most likely to be responsible for the distinctive boundary between communities found south and north of 50 m depth. This depth closely matches the boundary between the thermally stratified waters of the northern North Sea and the permanently vertically mixed waters of the southern North Sea (Brown *et al.*, 1999). Tidal currents maintain a turbulent regime in the southern North Sea, while in the northern North Sea the mixing is weaker and the water column stratifies in response to seasonal heating (Simpson, 1994). This causes higher seasonal fluctuations in bottom water temperature in the south than in the north.

Currents may also determine boundaries between benthic invertebrate and fish communities. Long-term circulation of the North Sea is anticlockwise (Simpson, 1994). However, this is not a basin-wide circulation. In the northern North Sea, the anticlockwise flow takes the form of a well-defined current, the Dooley Current, which follows the 100 m contour (Turrell *et al.*, 1992). Another inflow from the Atlantic enters the North Sea from north of Shetland and follows the 200 m contour along the western edge of the Norwegian Deep (Dooley, 1974). These currents may influence production, larval and post-larval distribution and may account for some of the community patterns we observe.

Beam trawling is a source of widespread and chronic disturbance in the North Sea. Experimental studies and comparisons between areas subject to different frequencies of trawling disturbance have shown that beam trawling leads to significant mortality of benthic fauna (Bergman and van Santbrink, 2000), reductions in the abundance of species with large body size (Rumohr and Kujawski, 2000) and reductions in production (Jennings *et al.*, 2001). These impacts are reflected in changes in community structure (e.g. Bergman and Hup, 1992; Frid and Hall, 1999; Frid *et al.*, 2000; Lindeboom and DeGroot, 1998). Sessile species are particularly vulnerable to the impacts of trawling (e.g. Collie *et al.*, 1997; Kaiser *et al.*, 1998, 2000; Freese *et al.*, 1999). Our results suggest that beam trawling effort was consistently correlated with benthic community structure, species richness and diversity. However, while Frid *et al.* (2000) and Rumohr and Kujawski (2000) have shown that long-term increases in the frequency of trawling disturbance have accounted for temporal changes in the structure of North Sea benthic communities, the results of our spatial comparisons among benthic communities in areas subject to different levels of trawling disturbance are more difficult to interpret. This is because large-scale patterns of beam trawling effort in the North Sea reflect the availability of substrata that are suitable for beam trawling (e.g. Rijnsdorp *et al.*, 1998). Such substrata are likely to be relatively mobile sediments that do not

necessarily provide good environments for the development of a species rich and abundant sessile fauna. Moreover, the natural disturbance that results from wave and tidal action on mobile sediments will favour communities dominated by free-living rather than sessile species. Disentangling the relative roles of fishing, habitat type and natural disturbance in influencing the large-scale structure of benthic communities will require spatial and temporal comparisons among communities in similar physical environments that are subject to different levels of trawling disturbance. To date, such comparisons have involved trade-offs between spatial scale, temporal scale and replication within habitat types. Now that we have shown that large-scale benthic surveys can be run in conjunction with the existing annual fisheries surveys, the annual collection of additional benthic samples within habitat types would allow us to examine the effects of trawling on unprecedented spatial and temporal scales.

## Acknowledgements

We wish to thank the officers and crew of the various research vessels involved in this survey for their co-operation. Many thanks to Brian Rackham and Richard Ayers from CEFAS for providing the ICES fish data and environmental data. Two anonymous referees made valuable comments on the first version of the manuscript. This study was funded by the European Community (DG IVX, 98/021).

## References

- Anon. 2001. Report of the working group on the assessment of demersal stocks in the North Sea and Skagerrak. ICES CM 2001/ACFM: 07.
- Anon. 1996. Manual for the International Bottom Trawl Surveys. Revision V. Addendum to ICES CM 1966/H1.
- Basford, D. J., Eleftheriou, A., and Raffaelli, D. 1990. The infauna and epifauna of the northern North Sea. *Netherlands Journal of Sea Research*, 25(1/2): 165–173.
- Basford, D. J., Eleftheriou, A., and Raffaelli, D. 1989. The epifauna of the northern North Sea (56–61°N). *Journal of the Marine Biological Association U.K.*, 69: 387–407.
- Bergman, M. J. N., and Hup, M. 1992. Direct effects of beamtrawling on macrofauna in a sandy sediment in the southern North Sea. *ICES Journal of Marine Science*, 49: 5–11.
- Bergman, M. J. N., and van Santbrink, J. W. 2000. Mortality in megafaunal benthic populations caused by trawl fisheries on the Dutch continental shelf in the North Sea in 1994. *ICES Journal of Marine Science*, 57: 1321–1331.
- Braber, L., and de Groot, S. J. 1973. The food of five flatfish species (Pleuronectiformes) in the southern North Sea. *Netherlands Journal of Sea Research*, 6: 163–172.
- Brey, T. 1999. Growth performance and mortality in aquatic macrobenthic invertebrates. *Advances in Marine Biology*, 35: 153–223.

- Brown, J., Hill, A. E., Fernand, L., and Horsburgh, K. J. 1999. Observations of a seasonal jet-like circulation at the central North Sea. *Estuarine, Coastal and Shelf Science*, 48: 343–355.
- Callaway, R., Cotter, J., Jennings, S., and Lancaster, J. 2002. Mesh-size matters in epibenthic surveys. *Journal of the Marine Biological Association U.K.*, 82: 1–8.
- Clarke, K. R., and Warwick, R. M. 1994. Change in marine communities: An approach to statistical analysis and interpretation. Natural Environment Research Council, UK. 144 pp.
- Collie, J. S., Escanero, G. A., and Valentine, P. C. 1997. Effects of bottom fishing on benthic megafauna of Georges Bank. *Marine Ecology Progress Series*, 155: 159–172.
- Connell, S. D., and Anderson, M. J. 1999. Predation by fish on assemblages of intertidal epibiota: effects of predator size and patch size. *Journal of Experimental Marine Biology and Ecology*, 241: 15–29.
- Dooley, H. D. 1974. Hypothesis concerning the circulation of the North Sea. *Journal du Conseil*, 36: 54–61.
- Duineveld, G. C., Künitzert, A. A., Niermann, U., De Wilde, P., and Gray, J. S. 1991. The macrobenthos of the North Sea. *Netherlands Journal of Sea Research*, 28(1/2): 53–65.
- Dyer, M. F., Frey, W. G., Frey, P. D., and Cranmer, G. J. 1983. Benthic regions within the North Sea. *Journal of the Marine Biological Association U.K.*, 63: 683–693.
- Frauenheim, K., Neumann, V., Thiel, H., and Türkay, M. 1989. The distribution of larger epifauna during summer and winter in the North Sea and its suitability for environmental monitoring. *Senckenbergiana maritima*, 20(3/4): 101–118.
- Freese, L., Auster, P. J., Heifetz, J., and Wing, B. L. 1999. Effects of trawling on seafloor habitat and associated invertebrate taxa in the Gulf of Alaska. *Marine Ecology Progress Series*, 182: 119–126.
- Frid, C. L. J., Harwood, K. G., Hall, S. J., and Hall, J. A. 2000. Long-term changes in the benthic communities on North Sea fishing grounds. *ICES Journal of Marine Science*, 57(5): 1303–1309.
- Frid, C. L. J., and Hall, S. J. 1999. Inferring changes in North Sea benthos from fish stomach analysis. *Marine Ecology Progress Series*, 184: 183–188.
- Glemarec, M. 1973. The benthic community of the European North Atlantic continental shelf. *Oceanography and Marine Biology*, Annual Review, 11: 263–289.
- Hamond, R. 1969. On the Norfolk marine area, and the offshore stations worked within it. *Transactions Norfolk and Norw. Natural Society*, 21: 209–228.
- Hill, M. O. 1973. Diversity and evenness: A unifying notation and its consequences. *Ecology*, 54: 427–432.
- Jennings, S., Lancaster, J., Woolmer, A., and Cotter, J. 1999. Distribution, diversity and abundance of epibenthic fauna in the North Sea. *Journal of the Marine Biological Association U.K.*, 79: 385–399.
- Jennings, S., Dinmore, T. A., Duplisea, D. E., Warr, K. J., and Lancaster, J. E. 2001. Trawling disturbance can modify benthic production processes. *Journal of Animal Ecology*, 70: 459–475.
- Kaiser, M. J., Ramsay, K., Richardson, C. A., Spence, F. E., and Brand, A. E. 2000. Chronic fishing disturbance has changed shelf sea benthic communities. *Journal of Animal Ecology*, 69: 494–503.
- Kaiser, M. J., Armstrong, P. J., Dare, P. J., and Flatt, R. P. 1998. Benthic communities associated with a heavily fished scallop ground in the English Channel. *Journal of the Marine Biological Association U.K.*, 78(4): 1045–1059.
- Knijn, R. J., Boon, T. W., Heessen, H. J. L., and Hislop, J. R. G. 1993. Atlas of North Sea fishes. ICES Co-operative Research Report, 194: 1–268.
- Kröncke, I. 1990. Macrofauna standing stock of the Dogger Bank. A comparison: II. 1951–1952 versus 1985–1987. Are changes in the community of the northeastern part of the Dogger Bank due to environmental changes? *Netherlands Journal of Sea Research*, 25: 189–198.
- Kühne, S., and Rachor, E. 1996. The macrofauna of a stony sand area in the German Bight (North Sea). *Helgoländer Meeresuntersuchungen*, 50: 433–452.
- Künitzer, A., Basford, D., Craeymeersch, J. A., Dewarumez, J. M., Dorjes, J., Duineveld, G. C. A., Eleftheriou, A., Heip, C., Herman, P., Kingston, P., Niermann, U., Rachor, E., Rumohr, H., and deWilde, P. A. J. 1992. The benthic infauna of the North Sea: species distribution and assemblages. *ICES Journal of Marine Science*, 49: 127–143.
- Lindeboom, H. J., and deGroot, S. J. (eds) 1998. Impact-II, The effects of different types of fisheries on the North Sea and Irish Sea benthic ecosystems. – NIOZ Rapport 1998-1-RIVO-DLO Report C003/98.
- Petersen, C. G. J. 1914. Valuation of the sea. II. The animal communities of the sea bottom and their importance for marine zoography. Report of the Danish Biological Station, 21: 1–44.
- Picton, B. E., and Howson, C. M. (eds) 1999. The species directory of the marine fauna and flora of the British Isles and surrounding Seas. Ulster Museum Publication No. 280.
- Rees, H. L., Pendle, M. A., Waldoock, R., Limpenny, D. S., and Boyd, S. E. 1999. A comparison of benthic biodiversity in the North Sea, English Channel, and Celtic Seas. *ICES Journal of Marine Science*, 56: 228–246.
- Rijnsdorp, A. D., Buijs, A. M., Storbeck, F., and Visser, E. 1998. Micro-scale distribution of beam trawl effort in the southern North Sea between 1993 and 1996 in relation to the trawling frequency of the sea bed and the impact on benthic organisms. *ICES Journal of Marine Science*, 55: 403–419.
- Rogers, S. I., Rijnsdorp, A. D., Damm, U., and Vanhee, W. 1998. Demersal fish populations in the coastal waters of the UK and continental NW Europe from beam trawl survey data collected from 1990 to 1995. *Journal of Sea Research*, 39: 79–102.
- Rumohr, H., and Kujawski, T. 2000. The impact of trawl fishery on the epifauna of the southern North Sea. *ICES Journal of Marine Science*, 57: 1389–1394.
- Simpson, J. H. 1994. Introduction to the North Sea project. *In* Understanding the North Sea system, pp. 1–4. Ed. by H. Charnock, K. R. Dyer, J. M. Huthnance, P. S. Liss, J. H. Simpson, and P. B. Tett. Chapman and Hall for the Royal Society, 222 pp.
- Sparholt, H. 1990. An estimate of the total biomass of fish in the North Sea. *Journal du Conseil, Conseil International pour l'Exploration de la Mer*, 46: 200–210.
- Turrell, W. R., Henderson, E. W., Slessor, G., Payne, R., and Adams, R. D. 1992. Seasonal changes in the circulation of the northern North Sea. *Continental Shelf Research*, 12: 257–286.
- Zühlke, R., Alvsåvåg, J., de Boois, I., Cotter, J., Ford, A., Hinz, H., Jarre-Teichmann, A., Jennings, S., Kröncke, I., Lancaster, J., Piet, G., and Prince, P. 2001. Epibenthic diversity in the North Sea. *In* Burning Issues of North Sea Ecology, pp. 99–372. Ed. by I. Kröncke, M. Türkay, and J. Sündermann. Proceedings of the 14th International Senckenberg Conference North Sea 2000, *Senckenbergiana maritima*, 31(2): 269–281.
